# Supplementary material for: Glycine Protects against Hypoxic-Ischemic Brain Injury by Regulating Mitochondria-Mediated Autophagy via the AMPK Pathway
Source: Hindawi journal article supplement (doi:10.1155/2019/4248529), 2019-02-06
Supplement: f1 [file 4248529.f1.pdf]

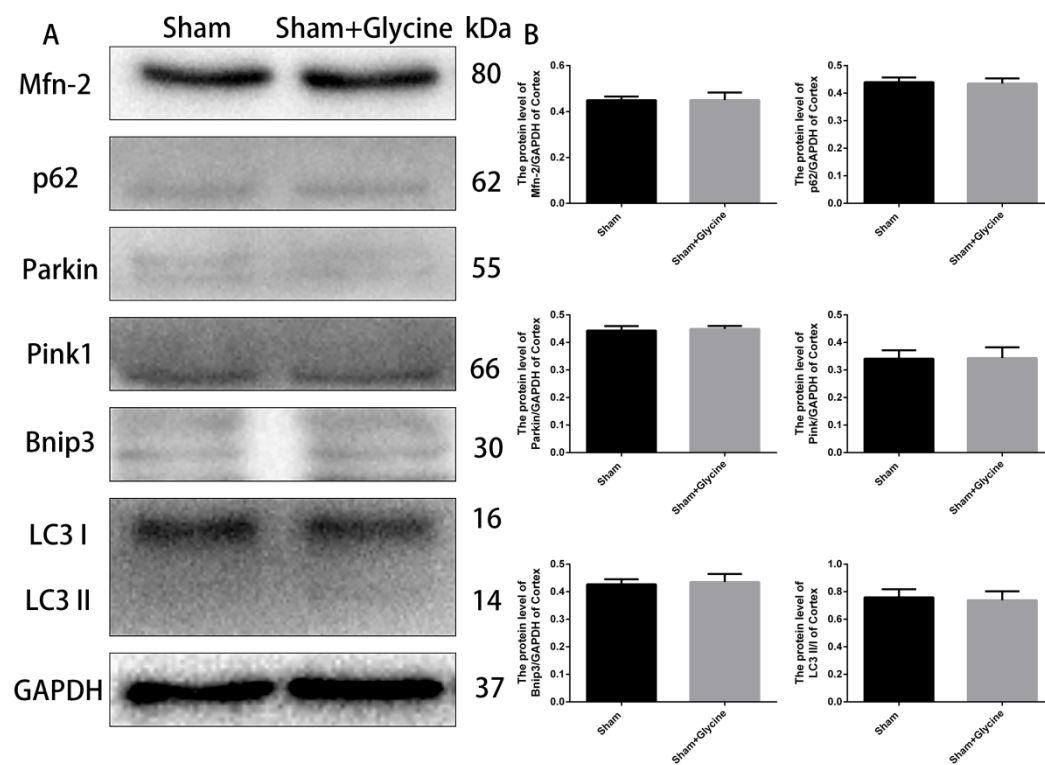

Suppl figure 1. The dosage of glycine pretreatment has no effect on normal cortex status of neonatal rats.

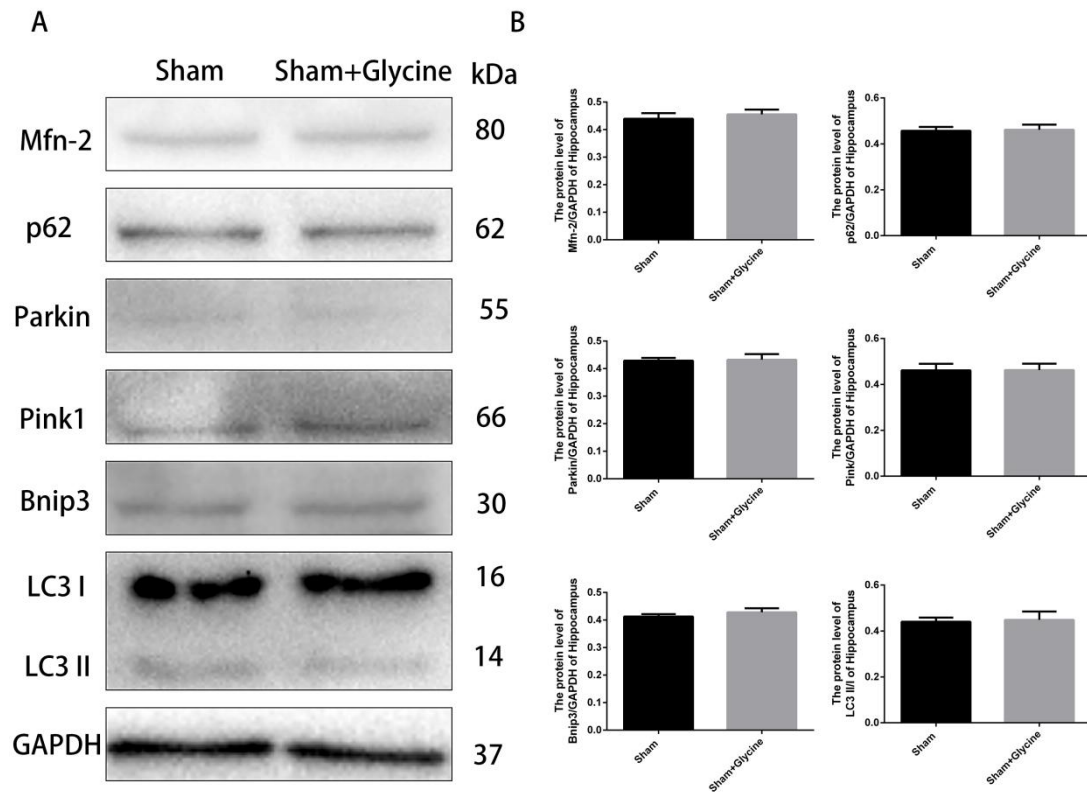

Suppl figure 2. The dosage of glycine pretreatment has no effect on normal hippocampus status of neonatal rats.

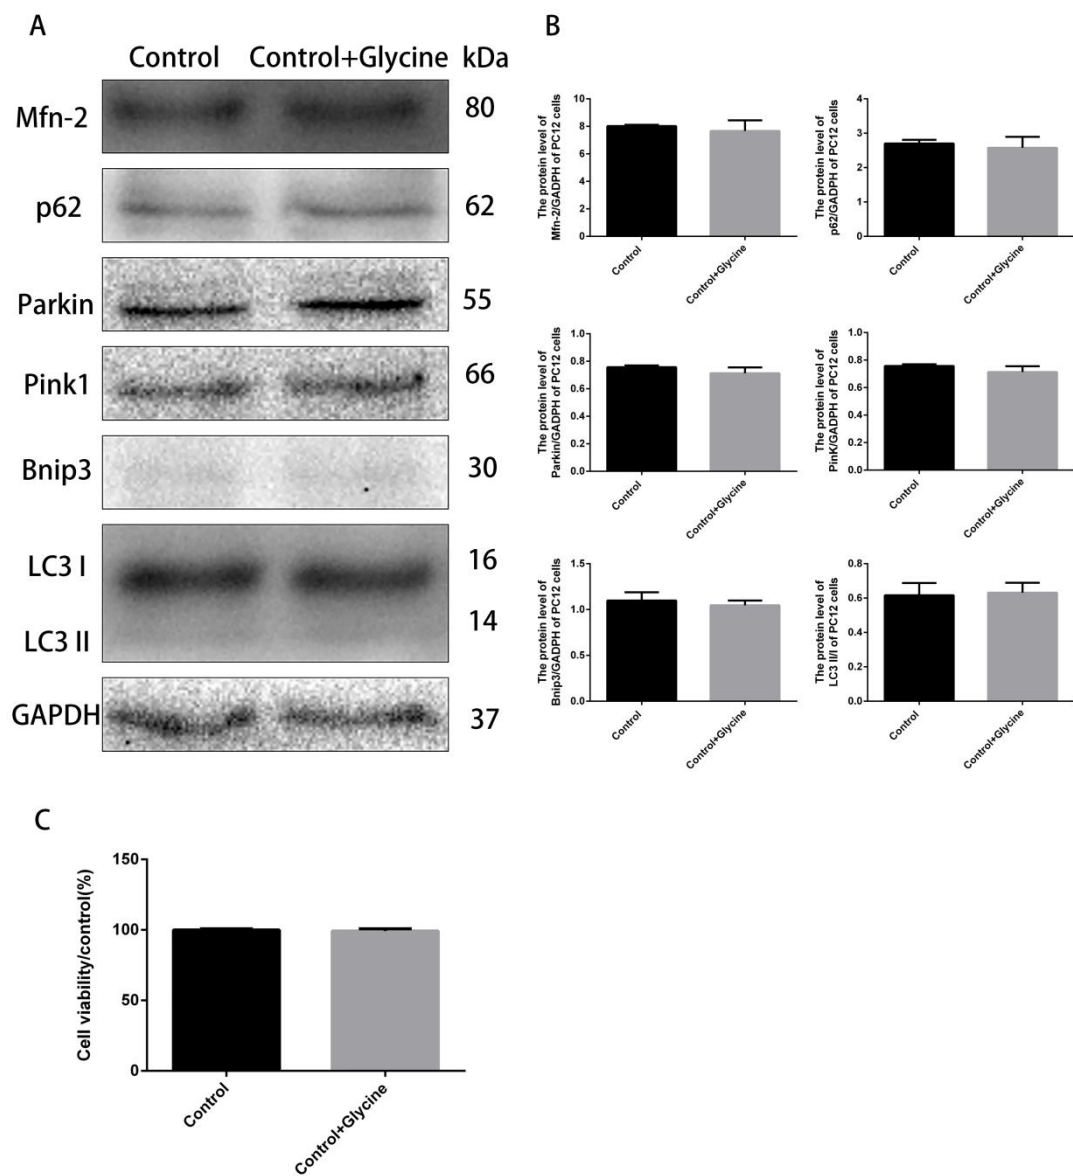

Suppl figure3. The dosage of glycine administration has no influence on normal status of PC12 cells.
